# Supplementary material for: Study of the Role of Void and Residual Silicon Dioxide on the Electrochemical Performance of Silicon Nanoparticles Encapsulated by Graphene
Source: MDPI journal article supplement (doi:10.3390/nano11112864), 2021-10-27
Supplement: s1 [file s1]

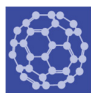

Supplementary Materials:

# Study of the role of void and residual silicon dioxide on the electrochemical performance of silicon nanoparticles encapsulated by graphene.

D.-P. Argyropoulos <sup>1,\*</sup>, G. Zardalidis <sup>1</sup>, P. Giotakos <sup>2</sup>, M. Daletou <sup>2</sup> and F. Farmakis <sup>1</sup>

<sup>1</sup> Electrical and Computer Engineering Dept., Democritus University of Thrace, Kimmeria Campus 67100 Xanthi, Greece; farmakis@ee.duth.gr

<sup>2</sup> Foundation of Research and Technology, Hellas - Institute of Chemical Engineering Sciences, FORTH/ICEHT, Stadiou Str, Platani Rion, P.O. Box 1414, Patras GR-26504, Greece; riadal@iceht.forth.gr

\* Correspondence: dimiargy56@gmail.com

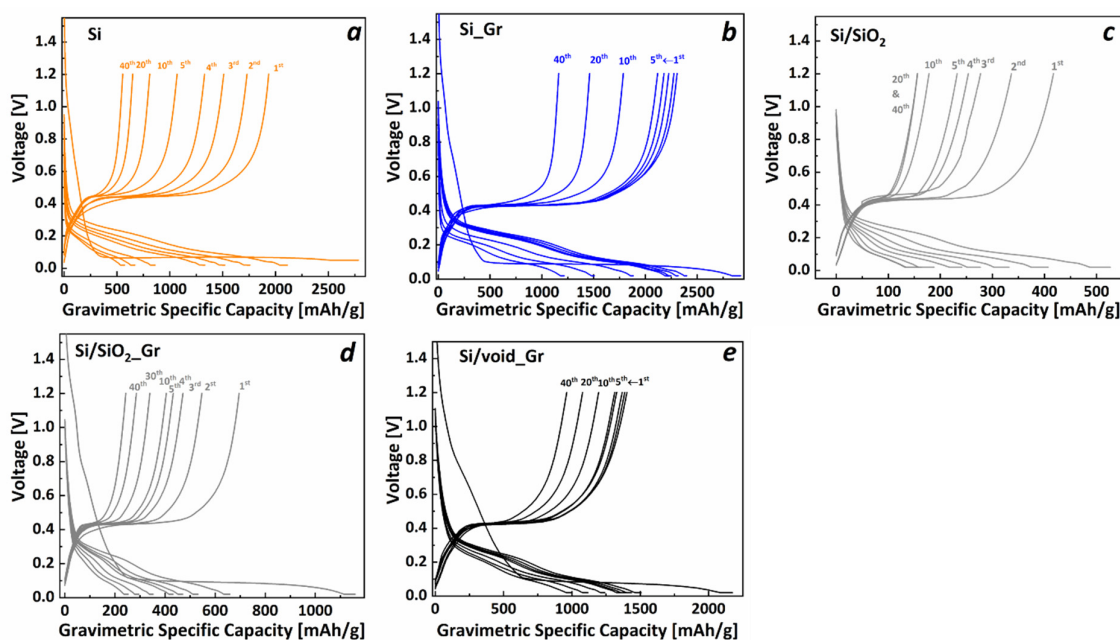

Figure S1: Voltage vs gravimetric specific capacity of electrodes (a) Si, (b) Si\_Gr, (c) Si/SiO<sub>2</sub>, (d) Si/SiO<sub>2</sub>\_Gr, and (e) Si/void\_Gr, for the charge discharge cycles 1 to 5, 10, 20 and 40, in coin-type half-cell configuration.
